# Supplementary material for: Photosensitized cleavage of plasmidic DNA by norharmane, a naturally occurring β-carboline
Source: Royal Society of Chemistry journal article supplement (doi:10.1039/c002235g), 2010-01-01
Supplement: c002235g.pdf [file c002235g.pdf]

## Electronic Supplementary Information (ESI)

### PHOTOSENSITIZED CLEAVAGE OF PLASMIDIC DNA BY NORHARMANE, A NATURALLY OCCURRING $\beta$ -CARBOLINE.

M. Micaela Gonzalez<sup>a</sup>, Magali Pellon-Maison<sup>b</sup>, Matias A. Ales-Gandolfo<sup>a</sup>, Maria R. Gonzalez-Baró<sup>b</sup>, Rosa Erra-Balsells<sup>a\*</sup> and Franco M. Cabrerizo<sup>a\*</sup>

<sup>a</sup> CIHIDECAR - CONICET, Departamento de Química Orgánica, Facultad de Ciencias Exactas y Naturales, Universidad de Buenos Aires, Pabellón 2, 3p, Ciudad Universitaria (1428), Buenos Aires, Argentina.

<sup>b</sup> INIBIOLP-CONICET, Universidad Nacional de La Plata, calle 60 y 120 (1900) La Plata, Argentina.

\* To whom correspondence should be addressed. ([fcabrerizo@qo.fcen.uba.ar](mailto:fcabrerizo@qo.fcen.uba.ar) and [erra@qo.fcen.uba.ar](mailto:erra@qo.fcen.uba.ar))

| <b>Contents:</b>                                              | <b><u>Page</u></b> |
|---------------------------------------------------------------|--------------------|
| 1. Photocleavage of DNA by norharmane performed at pH 4.7.    | S2                 |
| 2. Photocleavage of DNA by norharmane performed at pH 7.4.    | S3                 |
| 3. Photocleavage of DNA by norharmane performed at pH 10.2.   | S4                 |
| 4. Determination of the binding constant ( $K_G$ ) at pH 4.4. | S5                 |
| 5. Numerical Support.                                         | S6                 |
| 6. References.                                                | S9                 |

## 1. Photocleavage of DNA by norharmane performed at pH 4.7.

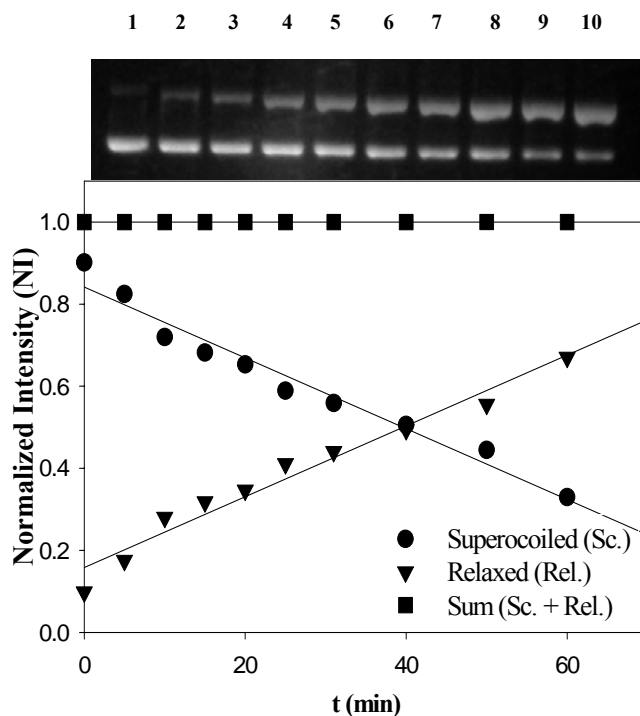

**Figure S1.** Evolution of normalized relative intensity of pGEM-3z plasmid forms (Sc. and Rel.) as a function of the irradiation time in the presence of norharmane. Experiment performed at pH = 4.7 where  $n\text{HoH}^+$  is present. Inset: Electrophoretic run: Lane 1 to 10 = solution of  $n\text{HoH}^+$  and pGEM-3z irradiated during 0, 5, 10, 15, 20, 25, 30, 40, 50 and 60 minutes, respectively. Note that the increase in the relaxed form concentration correlated very well with the decrease in the supercoiled form concentration.

## 2. Photocleavage of DNA by norharmane performed at pH 7.4.

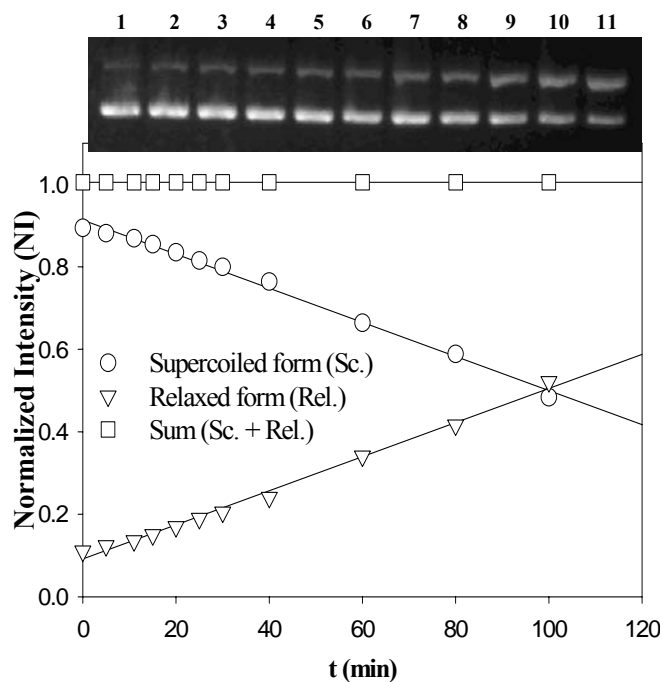

**Figure S2.** Evolution of normalized relative intensity of pGEM-3z plasmid forms (Sc. and Rel.) as a function of the irradiation time in the presence of norharmane. Experiment performed at pH = 7.4 where a mixture of both nHoH<sup>+</sup> and nHoN forms are present. Inset: Electrophoretic run: Lane 1 to 11 = solution of both nHoH<sup>+</sup> and nHoN and plasmidic DNA irradiated during 0, 5, 10, 15, 20, 25, 30, 40, 60, 80 and 100 minutes, respectively. Note that the increase in the relaxed form concentration correlated very well with the decrease in the supercoiled form concentration.

### 3. Photocleavage of DNA by norharmane performed at pH 10.2.

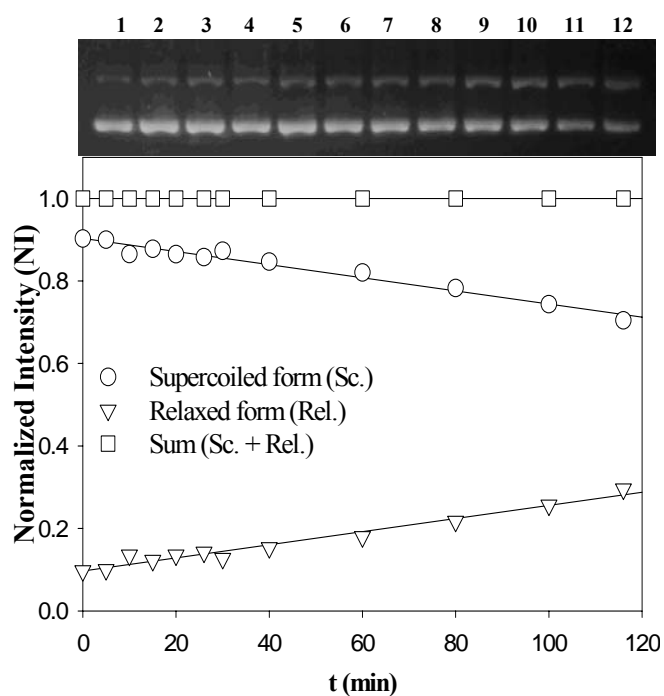

**Figure S3.** Evolution of normalized relative intensity of pGEM-3z plasmid forms (Sc. and Rel.) as a function of the irradiation time in the presence of norharmane. Experiment performed at pH = 10.2 where nHoN is present. Inset: Electrophoretic run: Lane 1 to 12 = solution of nHoN and plasmidic DNA irradiated during 0, 5, 10, 15, 20, 25, 30, 40, 60, 80, 100 and 116 minutes, respectively. Note that the increase in the relaxed form concentration correlated very well with the decrease in the supercoiled form concentration.

#### 4. Determination of the binding constant ( $K_G$ ) at pH 4.4.

The association constant ( $K_G$ ) between  $n\text{HoH}^+$  ( $\beta\text{C}$ ) and plasmidic DNA ( $\text{B}$ ) was analyzed by UV-vis spectrophotometric titration. Assuming a 1:1 stoichiometry for the complexes  $K_G$  can be estimated by using the Benesi-Hildebrand equation:

$$\frac{1}{\Delta A} = \frac{1}{(\epsilon_{\beta\text{C}\cdot\text{B}} - \epsilon_{\beta\text{C}})} \cdot \frac{1}{[\beta\text{C}]_0} + \frac{1}{K_G \cdot (\epsilon_{\beta\text{C}\cdot\text{B}} - \epsilon_{\beta\text{C}})} \cdot \frac{1}{[\text{B}]} \quad (\text{eq. S1})$$

where  $\epsilon_{\beta\text{C}\cdot\text{B}}$  and  $\epsilon_{\beta\text{C}}$  are the molar absorption coefficients of  $n\text{HoH}^+$ -DNA complex ( $\beta\text{C}\cdot\text{B}$ ) and  $n\text{HoH}^+$  ( $\beta\text{C}$ ), respectively, at the titration wavelength.  $\Delta A$  is the change of absorbance relative to the completely free  $n\text{HoH}^+$  at this wavelength.

The plots of the experimental data obtained at pH 4.4, according to equation S1, showed good linearity (see Figure S4), confirming the 1:1 stoichiometry of the complex.  $K_G$  obtained from the slope and intercept of these plots were  $4.5 (\pm 0.5) \times 10^4 \text{ M}^{-1}$ .

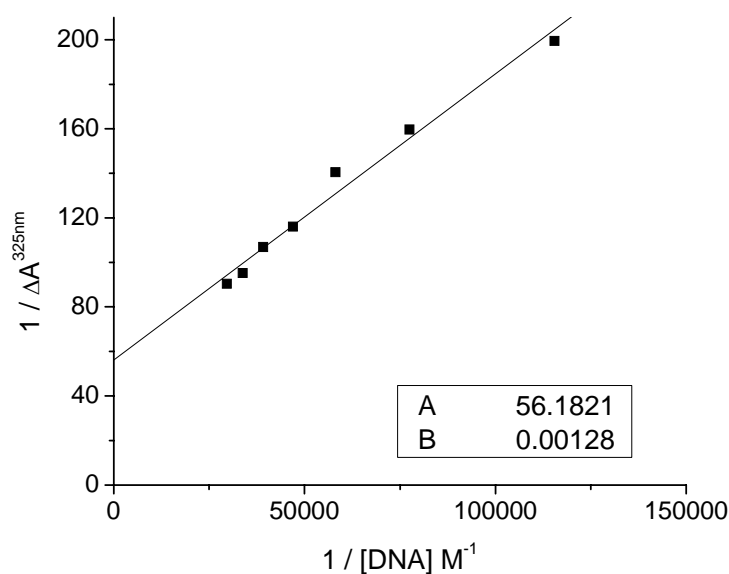

Figure S4. A representative example of the Benesi-Hildebrand plot for  $n\text{HoH}^+$  / plasmidic DNA system.

## 5. Numerical Support.

In this discussion, we are providing a numerical estimation of the extent of the DNA photocleavage reaction observed in the experiments performed under physiological pH conditions (pH = 7.4).

In general, all the photophysical and photochemical processes in which the excited state of a photosensitizer ( $[M]^*$ ) is generated and / or deactivated can be described in four main steps or equations: (eq. S2 1) absorption of the incident light by M; (eq. S3 2) fluorescence emission deactivation of  $M^*$ ; (eq. S4 3) all the deactivation pathways of  $M^*$  other than quenching process with a quencher (Q); and (eq. S5 4) deactivation pathway of  $M^*$  due to quenching with Q:

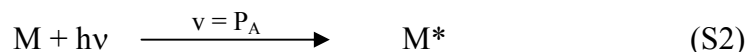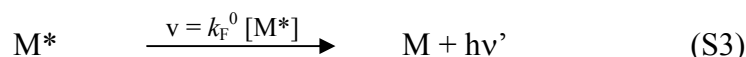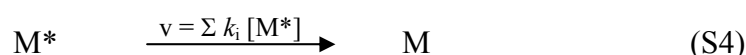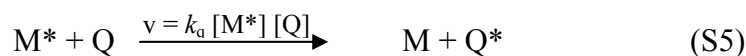

where  $P_A$  is the rate of the absorbed photon flux,  $k_F^0$  is the intrinsic fluorescence rate constant,  $k_i$  represents the rate constants of each deactivation pathway different from the quenching process and  $k_q$  is the rate constant of the bimolecular quenching.

Taking into account equations S2 to S5, the following equation can be written:

$$\frac{d[M^*]}{dt} = P_A - k_F^0 [M^*] - \sum k_i [M^*] - k_q [Q] [M^*] \quad (S6)$$

Under continuous irradiation and assuming a steady-state regime  $-d[M^*]/dt \approx 0$ . Thus, the concentration of  $[M]^*$  can be calculated from equation (S7):

$$[M]^* = \frac{P_A}{k_F^0 + \sum k_i + k_q [Q]} \quad (S7)$$

Considering that  $P_A = (1 - 10^{-A}) P_0$ , where  $P_0$  is the rate of the incident photon flux and A is the

absorbance at the excitation wavelength (350 nm). Then equation (S7) can be re-written in terms of the fraction of  $P_0$  absorbed by de sensitizer:

$$[M]^* = (1 - 10^{-A}) C \quad (\text{S8})$$

where C represents  $P_0 / (k_F^0 + \sum k_i + k_q [Q])$ .

As it was discussed in the main text of this work the single excited state of the protonated form of norharmane ( $^1[nHoH^+]$ \*) is the specie responsible for the DNA photocleavage reaction under all the pH conditions analyzed. Therefore, the calculation of the steady-state concentration of  $^1[nHoH^+]$  produced upon continuous irradiation of the solutions at different pH, would provide a very good estimation on the relative extent of the reaction that should be expected.

(a)  $^1[nHoH^+]$ \* steady-state concentration at pH 4.7: Under this pH condition more than a 99 % of norharmane is present in its protonated form ( $nHoH^+$ ). Thus, the whole incident light (350 nm) is absorbed by  $nHoH^+$  to yield  $[nHoH^+]$ \*. Taking into account that the total absorbance ( $A_T$ ) of the solution at 350 nm was 0.3 (measured in a quartz cell of 4 mm optical path length); then, from eq. (S8):

$$[nHoH^+]* = 0.5 \times C \quad (\text{at pH 4.7})$$

(b)  $^1[nHoH^+]$ \* steady-state concentration at pH 10.2: On the contrary, at pH = 10.2 more than a 99 % of norharmane is present in its neutral form ( $nHoN$ ). This means that, at 350 nm, the whole incident light is absorbed by  $nHoN$  to yield  $[nHoN]$ \*. However, even in pH 10.2 aqueous solutions,  $[nHoN]$ \* is readily protonated, by rapid proton exchange with the solvent<sup>1,2</sup>. Thus, the photochemical and photophysical behavior of  $nHoN$  occurs mainly from the excited-state of the protonated form of norharmane ( $^1[nHoH^+]$ \*), instead of the excited state of the neutral form ( $^1[nHoN]$ \*). It was demonstrated that, in the case of norharmane, only a fraction ~ 28 % of the  $S_1$  of  $nHoN$  goes on with the protonation yielding  $[nHoH^+]$ \*<sup>3,4</sup>. Taking into account that  $A_T$  was 0.3 (4 mm optical path length), then:

$$[nHoH^+]* = 0.28 \times [nHoN]* = 0.28 \times 0.5 \times C = 0.14 \times C \quad (\text{at pH 10.2})$$

This value corresponds to a 28 % decrease in the  $[nHoH^+]$ \* steady-state concentration, in comparison with the value obtained at pH 4.7 ( $0.5 \times C$ ). As consequence, should be observed a ~30 % decrease of the DNA photocleavage reaction at pH 10.2 in comparison with the reaction at pH 4.7. The

experimental results described in the Discussion section of the present paper are in good agreement with this calculation (i.e., the initial relaxation rates of the supercoiled DNA ( $d[\text{Sc}]/dt$ ) observed were  $-8.2 (\pm 0.9) \times 10^{-3} \text{ NI} \times \text{min}^{-1}$  and  $-2.3 (\pm 0.5) \times 10^{-3} \text{ NI} \times \text{min}^{-1}$  at pH 4.7 and 10.2, respectively; indicating a decrease of 28 %).

(c)  $^1[\text{nHoH}^+]$ \* steady-state concentration at pH 7.4: In aqueous solution norharmane shows an acid-base equilibrium with a  $pK_a$  value of 7.2. Thus, at pH 7.4 a mixture of both protonated ( $\text{nHoH}^+$ ) and neutral ( $\text{nHoN}$ ) form of norharmane are present in the irradiated solution (i.e., ~ 38 % and 62 % of  $\text{nHoH}^+$  and  $\text{nHoN}$ , respectively). Despite the fact that this experiment was also done by using a solution with a total absorbance ( $A_T$ ) of 0.3 (4 mm optical path length), the fraction of the incident light that is absorbed by each norharmane species should be taken into account when calculation  $^1[\text{nHoH}^+]$ \* steady-state concentration is attempted.

On the basis of the  $pK_a$  (7.2) and the  $A_T$  (0.3), at pH = 7.4 the initial concentration of  $\text{nHoH}^+$  and  $\text{nHoN}$  are 85  $\mu\text{M}$  and 135  $\mu\text{M}$ , respectively. Taking into account both the corresponding molar absorption coefficient ( $\epsilon$ ), at the excitation wavelength, of each species (i.e.,  $\epsilon = 2776 \text{ M}^{-1} \text{ cm}^{-1}$  and  $3807 \text{ M}^{-1} \text{ cm}^{-1}$  for  $\text{nHoH}^+$  and  $\text{nHoN}$ , respectively), and the optical path length, the contribution to the  $A_T$  of  $\text{nHoH}^+$  and  $\text{nHoN}$  can be calculated (i.e., 0.09 and 0.21, respectively).

Eq. (S8) can be used to calculate the steady-state concentration of  $^1[\text{nHoH}^+]$ \* also under this pH condition. For this purpose eq. (S8) should be slightly modified to take into account the contribution of  $\text{nHoH}^+$  and  $\text{nHoN}$  to the total  $^1[\text{nHoH}^+]$ \* concentration:

$$[\text{nHoH}^+]* = (1 - 10^{-0.09}) \times C + (1 - 10^{-0.21}) \times 0.28 \times C = 0.30 \times C \quad (\text{at pH 4.7})$$

This latter value corresponds to a 60 % decrease in the  $[\text{nHoH}^+]$ \* steady-state concentration in comparison with the value obtained at pH 4.7 ( $0.5 \times C$ ). This fact should induce a ~60 % decrease of the DNA photocleavage reaction at pH 7.4 in comparison with the reaction performed at pH 4.7. This prediction agrees with the experimental results described main text, where  $d[\text{Sc}]/dt$  values observed were  $-8.2 (\pm 0.9) \times 10^{-3} \text{ NI} \times \text{min}^{-1}$  and  $-4.2 (\pm 0.5) \times 10^{-3} \text{ NI} \times \text{min}^{-1}$ , at pH 4.7 and 7.4, respectively (i.e., a decrease of 54 %).



## 6. References.

---

- 1 A. Varela, H. Burrows, P. Douglas and M.J. da Graça, *Photochem. Photobiol. A: Chem.*, 2001, **146**, 29–36.
- 2 S. Draxler and M. E. Lippitsch, *J. Phys. Chem.*, 1993, **97**, 11493–11496
- 3 M. M. Gonzalez, M. L. Salum, Y. Gholipour, F. M. Cabrerizo and R. Erra-Balsells, *Photochem. Photobiol. Sci.*, 2009, **8**, 1139–1149.
- 4 M. M. Gonzalez, J. Arnbjerg, M. P. Denofrio, R. Erra-Balsells, P. R. Ogilby and F. M. Cabrerizo, *J. Phys. Chem. A*, 2009, **113**, 6648–6656.
